## Evidence for a shared genetic contribution to loneliness and Borderline Personality Disorder

Anna Schulze<sup>1\*</sup>, Fabian Streit<sup>2\*</sup>, Lea Zillich<sup>2</sup>, Swapnil Awasthi<sup>3,4</sup>, Alisha S M Hall<sup>2</sup>, Martin Jungkunz<sup>5</sup>, Nikolaus Kleindienst<sup>6</sup>, Josef Frank<sup>2</sup>, Cornelia E Schwarze<sup>7</sup>, Norbert Dahmen<sup>8</sup>, Björn H Schott<sup>9,10,11</sup>, Markus Nöthen<sup>12</sup>, Arian Mobascher<sup>13</sup>, Dan Rujescu<sup>14</sup>, Klaus Lieb<sup>8</sup>, Stefan Roepke<sup>15</sup>, Sabine C Herpertz<sup>16</sup>, Christian Schmahl<sup>6</sup>, Martin Bohus<sup>6,17</sup>, Stephan Ripke<sup>3,4,18</sup>, Marcella Rietschel<sup>2</sup>, Stefanie Lis<sup>1;6\*</sup>, Stephanie Witt<sup>2\*</sup>

\*contributed equally

Word Count: 4.351

<sup>1</sup>Department of Clinical Psychology, Central Institute of Mental Health, Medical Faculty Mannheim, Heidelberg University, Mannheim, Germany

<sup>2</sup>Department of Genetic Epidemiology in Psychiatry, Central Institute of Mental Health, Medical Faculty Mannheim, Heidelberg University, Mannheim, Germany

<sup>3</sup>Stanley Center for Psychiatric Research, Broad Institute of MIT and Harvard, Cambridge, MA, USA

<sup>4</sup>Department of Psychiatry and Psychotherapy, Charité Universitätsmedizin Berlin, Campus Mitte, Berlin, Germany

<sup>5</sup>Section for Translational Medical Ethics, National Center for Tumor Diseases, German Cancer Research Center (DKFZ), Heidelberg, Germany

<sup>6</sup>Department of Psychosomatic Medicine and Psychotherapy, Central Institute of Mental Health, Medical Faculty Mannheim, Heidelberg University, Germany

<sup>7</sup>Department of Developmental and Biological Psychology, Heidelberg University, Heidelberg, Germany

<sup>8</sup>Department of Psychiatry and Psychotherapy, University Medical Center, Mainz, Germany

<sup>9</sup>Leibniz Institute for Neurobiology, Magdeburg, Germany

<sup>10</sup>Department of Psychiatry and Psychotherapy, University Medical Center Göttingen, Göttingen, Germany

<sup>11</sup>German Center for Neurodegenerative Diseases (DZNE), Göttingen, Germany

<sup>12</sup>Institute of Human Genetics, University Hospital Bonn, Bonn, Germany

<sup>13</sup>Department of Psychiatry and Psychotherapy, St. Elisabeth Krankenhaus Lahnstein, Lahnstein, Germany

<sup>14</sup>Department of Psychiatry and Psychotherapy, Medical University of Vienna, Vienna, Austria

<sup>15</sup>Department of Psychiatry and Neuroscience, Charité – Universitätsmedizin Berlin, Berlin, Germany

<sup>16</sup>Department of General Psychiatry, Center for Psychosocial Medicine, Medical Faculty, Heidelberg University, Heidelberg, Germany

<sup>17</sup>Department of Clinical Psychology, Ruhr University Bochum, Bochum, Germany

<sup>18</sup>Massachusetts General Hospital and Department of Medicine, Harvard Medical School, Analytic and Translational Genetics Unit, Boston, MA, USA

**NOTE: This preprint reports new research that has not been certified by peer review and should not be used to guide clinical practice.**

Corresponding author: Anna Schulze, E-mail: [anna.schulze@zi-mannheim.de](mailto:anna.schulze@zi-mannheim.de)

Post-Publication Corresponding Author: Fabian Streit, E-mail: [fabian.streit@zi-mannheim.de](mailto:fabian.streit@zi-mannheim.de)

Central Institute of Mental Health, P.O. Box 12 21 20, 68072 Mannheim, Germany

1 **Abstract**

2 Background: Loneliness, influenced by genetic and environmental factors such as childhood  
3 maltreatment, is one aspect of interpersonal dysfunction in Borderline Personality Disorder (BPD).  
4 Numerous studies link loneliness and BPD and twin studies indicate a genetic contribution to this  
5 association. The aim of our study was to investigate whether genetic predisposition for loneliness  
6 and BPD risk overlap and whether genetic risk for loneliness contributes to higher loneliness reported  
7 by BPD patients, using genome-wide genotype data.

8 Methods: We assessed the genetic correlation of genome-wide association studies (GWAS) of  
9 loneliness and BPD using linkage disequilibrium score regression and tested whether a polygenic  
10 score for loneliness (loneliness-PGS) was associated with case-control status in two independent  
11 genotyped samples of BPD patients and healthy controls (HC; sample 1: 998 BPD, 1545 HC; sample 2:  
12 187 BPD, 261 HC). In sample 2, we examined associations of loneliness-PGS with reported loneliness,  
13 and whether the loneliness-PGS influenced the association between childhood maltreatment and  
14 loneliness.

15 Results: We found a genetic correlation between the GWAS of loneliness and BPD, a positive  
16 association of loneliness-PGS with BPD case-control status, and a positive association between  
17 loneliness-PGS and loneliness across groups. The loneliness-PGS did not moderate the association  
18 between childhood maltreatment and loneliness in BPD.

19 Conclusion: Our study is the first to use genome-wide genotype data to show that the genetic factors  
20 underlying variation in loneliness in the general population and the risk for BPD overlap. The  
21 loneliness-PGS was associated with reported loneliness, indicating that genetic predisposition for  
22 loneliness might contribute to BPD risk.

23

24 *Keywords:* Borderline Personality Disorder; Loneliness; Polygenic Score

## 25 **1 Introduction**

26 A pervasive feeling of loneliness is one aspect of interpersonal dysfunction in Borderline Personality  
27 Disorder (BPD; American Psychiatric Association, 2013). It has been discussed for a long time that  
28 loneliness is partly attributable to childhood maltreatment and to genetic factors, which is supported  
29 by the results of family and twin studies (Boomsma, Willemsen, Dolan, Hawkley, & Cacioppo, 2005;  
30 Distel et al., 2010; Matthews et al., 2016). In the recent years, genome-wide association studies  
31 (GWAS) have identified genetic variation associated with loneliness (Day, Ong, & Perry, 2018) and, to  
32 a lesser degree, with BPD (Witt et al., 2017). Despite findings from twin studies supporting a genetic  
33 correlation between BPD and loneliness, it has not yet been investigated whether the genetic variants  
34 associated with loneliness are more common in individuals with BPD. The current study uses genome-  
35 wide genetic data to assess the genetic and phenotypic overlap between loneliness and BPD and  
36 explore its association with childhood maltreatment.

37 Loneliness is a negative affective state resulting from the discrepancy between desired and  
38 experienced social connectedness (Peplau & Perlman, 1982). Its development is multifactorial,  
39 resulting from different environmental and biological factors (Boomsma et al., 2005). Objective social  
40 isolation may contribute to the feeling of loneliness, but is neither necessary nor sufficient to fully  
41 explain it: for example, people who are embedded in a large social network may feel lonely, while  
42 people with a small number of social contacts may not (Cacioppo et al., 2000). A short-lasting acute  
43 experience of loneliness is assumed to have a beneficial evolutionary function, promoting behaviours  
44 to reconnect to the social environment (Cacioppo, Cacioppo, & Boomsma, 2014). In contrast, long-  
45 lasting feelings of loneliness have been linked to an increased risk to health and a detrimental effect  
46 on the course of both somatic and mental disorders (Holt-Lunstad, Smith, Baker, Harris, & Stephenson,  
47 2015; Mushtaq, Shoib, Shah, & Mushtaq, 2014; Pengpid & Peltzer, 2021).

48 While loneliness is a transdiagnostic feature of psychopathology, it plays a central role in interpersonal  
49 dysfunction in BPD: individuals with BPD often report a lack of sense of belonging and the fear of being  
50 abandoned or socially excluded (American Psychiatric Association, 2013). BPD is a personality disorder

51 with a lifetime prevalence of 2.7% (Trull, Jahng, Tomko, Wood, & Sher, 2010) associated with a high  
52 economic burden to the health care system and economy (e.g. Meuldijk, McCarthy, Bourke, & Grenyer,  
53 2017). Several studies have shown increased levels of loneliness in BPD, which have been linked to  
54 smaller social networks (Liebke et al., 2017; Nenov-Matt et al., 2020). Furthermore, loneliness in BPD  
55 is linked to impairments of social-cognitive processing such as the certainty experienced during social-  
56 emotional judgments (Thome et al., 2016) and the strength of basic affiliative behaviours, such as  
57 behavioural mimicry (Hauschild et al., 2018). BPD patients describe the feeling of loneliness as a  
58 persisting state arising as early as in childhood (Sagan, 2017), suggesting that an increased propensity  
59 towards loneliness might contribute to this experience. Disorder-specific therapeutic interventions are  
60 successful in improving acute symptoms such as impulsivity or non-suicidal self-harming behaviours,  
61 but are less effective in reducing the feeling of loneliness with consequences for persistence of  
62 impairments in the patients' social functioning level (Zanarini, Frankenburg, Reich, & Fitzmaurice,  
63 2016; Zanarini et al., 2007). Therefore, a deeper understanding of the determinants of loneliness in  
64 BPD is of particular interest to facilitate the development of therapeutic approaches that are more  
65 efficient in reducing loneliness.

66 In recent years, the study of genetic risk factors has received increasing attention in the study of inter-  
67 individual differences in mental health (Andreassen, Hindley, Frei, & Smeland, 2023). Twin and family  
68 studies aim to estimate the influence of genetic and environmental influences on the variation of traits  
69 or disorder risk using the information on genetic relatedness and shared family environment (Shih,  
70 Belmonte, & Zandi, 2004). In contrast, genome-wide association studies (GWAS) identify single  
71 nucleotide polymorphisms (SNPs), i.e. common changes of single base pairs in the DNA, associated  
72 with a specific phenotype. For psychiatric symptoms and disorders, the so called SNP-based  
73 heritability, i.e. the variance explained by the common variants assessed in a GWAS, usually accounts  
74 for around one third of the heritabilities estimated in twin studies (Andreassen et al., 2023). Besides  
75 insights into specific genes and pathways involved in disease etiology, GWAS also allow the estimation  
76 to what degree the association signal, and thereby the underlying genetic factors, are shared between

77 disorders and traits. For example, genetic correlations can be estimated using summary statistics of  
78 independent GWAS with linkage disequilibrium (LD)-score regression (Bulik-Sullivan et al., 2015).  
79 Another approach is the calculation of polygenic scores (PGS) based on the identified associations in  
80 GWAS (discovery samples) in independent target samples of healthy or affected individuals,  
81 representing the individual's propensity towards a disease or trait (Wray et al., 2014). While PGS of  
82 psychiatric phenotypes still only explain a limited amount of variance and are therefore not applicable  
83 in clinical practice, they have proven to be a useful tool in research to investigate, for example, the  
84 association of the genetic predisposition to a trait with related phenotypes.

85 Family and twin studies demonstrate that genetic factors contribute to BPD as well as to loneliness.  
86 The heritability of BPD is estimated to be around 46–69% (Skoglund et al., 2021; Torgersen et al., 2000),  
87 while genetic factors explain approximately 38–48% of the variance in loneliness in adults (Boomsma  
88 et al., 2005; Distel et al., 2010; Matthews et al., 2016). Analyses of shared genetic and environmental  
89 factors for borderline personality features and loneliness revealed a high genetic correlation of  $r = .64$ ,  
90 but also a unique environmental correlation of  $r = .40$  in a twin study (Schermer et al., 2020). Findings  
91 of another twin study indicated that loneliness might mainly be a consequence of the genetic  
92 determinants of BPD traits (Skaug, Czajkowski, Waaktaar, & Torgersen, 2022).

93 A GWAS assessing borderline personality features as a dimensional trait found a SNP-heritability of  
94 23% (Lubke et al., 2014). Moreover, the polygenic score (PGS) for borderline personality features based  
95 on this GWAS was found to have a positive association with neuroticism (Gale et al., 2016), a  
96 personality trait associated with loneliness (Buecker, Maes, Denissen, & Luhmann, 2020). So far, one  
97 case-control GWAS, i.e. comparing BPD patients diagnosed using established diagnostic systems to  
98 controls, has been performed which did not identify associated single variants but indicated significant  
99 gene-based associations in the genes *DPYD* and *PKP4* (Witt et al., 2017). BPD was found to have  
100 positive genetic correlations with major depression, bipolar disorder, and schizophrenia (Witt et al.,  
101 2017) as well as with the personality traits neuroticism and, to a lesser degree, openness to experience  
102 (Streit et al., 2022). At the same time, a recent GWAS in the UK Biobank identified 15 genome-wide

103 significant loci associated with loneliness (Day et al., 2018), measured by three variables assessing the  
104 feeling of loneliness, the frequency of interacting with others and the possibility to confide in others.  
105 Associations of PGS for loneliness were found with personality traits, especially neuroticism, and a  
106 wide range of somatic but also psychiatric disorders such as mood disorders and depression in a  
107 phenome-wide association study (PheWAS; Abdellaoui, Sanchez-Roige, et al., 2019). However, this  
108 data has not been used yet to study the association of loneliness with BPD.

109 Childhood maltreatment has been identified a major environmental risk factor for BPD with individuals  
110 with a diagnosis of BPD being around thirteen times more likely to report childhood maltreatment than  
111 non-clinical controls (Kleindienst, Vonderlin, Bohus, & Lis, 2021; Porter et al., 2020). Some studies  
112 suggest an interaction between adverse life events and the genetic risk for mental disorders (e.g.  
113 Coleman et al., 2020; Colodro-Conde et al., 2018). Since childhood maltreatment is also related to a  
114 higher risk for perceived social isolation in adulthood (Gibson & Hartshorne, 1996; Sheikh, 2018;  
115 Shevlin, McElroy, & Murphy, 2015), childhood maltreatment might be crucial in gene-environment  
116 interactions associated with loneliness in BPD.

117 The aim of the present study was to investigate the genetic and phenotypic overlap between loneliness  
118 and BPD and explore its association with childhood maltreatment. For this, we analysed data from two  
119 independent genotyped BPD samples. First we used GWAS results to test the genetic correlation  
120 between a previously published GWAS sample of BPD (sample 1; Witt et al., 2017) and a GWAS of  
121 loneliness (Day et al., 2018) with LD-score regression. Furthermore, we calculated PGS for loneliness  
122 (loneliness-PGS) in sample 1 to investigate whether the loneliness-PGS is a predictor for a participant  
123 belonging to the BPD or HC group (case-control status). In sample 2, we replicated this investigation in  
124 an independent clinical sample of well-characterized patients with BPD and healthy controls (HC). In  
125 addition, we investigated associations of the loneliness-PGS with self-reported loneliness, and  
126 explored whether a genetic propensity for loneliness estimated as PGS influenced the association  
127 between the level of self-reported childhood adversity and the experience of loneliness. Furthermore,  
128 we analysed whether our findings can be explained by the genetic disposition to neuroticism, a

129 personality trait associated with loneliness and BPD in the past (Abdellaoui, Sanchez-Roige, et al., 2019;  
130 Buecker et al., 2020; Streit et al., 2022).

131 Due to the genetic correlation of loneliness with borderline personality features observed in a twin  
132 study (Schermer et al., 2020) and known association of loneliness-PGS with psychiatric disorders in a  
133 phenomewide association study (Abdellaoui, Sanchez-Roige, et al., 2019), we expected 1) a positive  
134 genetic correlation between loneliness and BPD, 2) higher loneliness-PGS in BPD cases compared to  
135 controls, and 3) a positive association of the loneliness-PGS and an individual's loneliness. Finally, we  
136 explored whether 4) the severity of childhood maltreatment predicts loneliness stronger for BPD  
137 patients with a high genetic risk for loneliness.

## 138 **2 Materials and Methods**

### 139 ***2.1 Sample 1***

#### 140 ***2.1.1 Sample Characteristics***

141 Sample 1 consisted of a BPD GWAS sample described in detail previously in Witt et al. (2017). Briefly,  
142 controls and subjects meeting DSM-IV criteria for BPD were recruited at three academic institutions in  
143 Germany. All subjects provided written informed consent, and the study was approved by the local  
144 ethics committees. After quality control (see below), the sample consisted of 998 cases and 1545  
145 controls.

#### 146 ***2.1.2 Genetic correlation analysis***

147 To obtain a point estimate of the genetic correlation of loneliness with BPD, we used LD-score  
148 regression (Bulik-Sullivan et al., 2015). LD-score regression allows the calculation of genetic  
149 correlations of GWAS that have been carried out in independent samples. Calculations were carried  
150 out with a free intercept and the European ancestry samples from the 1000 Genomes data as LD  
151 structure reference panel (The 1000 Genomes Project Consortium, 2010). Summary statistics from the  
152 GWAS of loneliness (N = 452 302; Day et al., 2018) and the GWAS of BPD (998 cases, 1545 controls;  
153 Witt et al., 2017) were used as input.

#### 154 ***2.1.3 Polygenic Scores***

155 For the present analyses, PGS were calculated based on an updated quality control and imputation  
156 procedure, which has been described in detail in Streit et al. (2022). Subjects were genotyped using  
157 Illumina Infinium PsychArray-24 Bead Chips (Illumina, San Diego, CA, USA). Genetic markers and  
158 subjects were filtered after the following exclusion criteria: genotypic and individual missingness (>  
159 2%), missingness differences between cases and controls (> 2%), deviation from autosomal  
160 heterozygosity ( $|F_{het}| > 0.2$ ) or deviation from Hardy-Weinberg equilibrium (controls:  $p < 1 \times 10^{-6}$ ,  
161 cases:  $p < 1 \times 10^{-10}$ ). Additionally, subjects were excluded when they showed sex mismatches, cryptical  
162 relatedness, or were genetic outliers.

163 Imputation was performed with the publicly available reference panel from the Haplotype Reference  
164 Consortium (EGAD00001002729), using EAGLE/MINIMAC3 (default settings, variable chunk size of 132  
165 genomic chunks; Das et al., 2016; Loh et al., 2016), and best-guess genotypes were used for PGS  
166 analyses.

167 For PGS calculation, variants in the target sample were filtered for imputation quality with an INFO  
168 score of  $\geq 0.9$ , and minor allele frequency of  $\geq 5\%$ . PGS were then calculated using PRSice 2.1.6  
169 clumping SNPs based on the p-value in the discovery samples and LD-structure in the target sample  
170 with standard settings (distance = 250kb,  $p = 1$ ,  $r^2 = 0.1$ ) (Choi & O'Reilly, 2019). PGS were calculated  
171 for loneliness (loneliness-PGS) using summary statistics from Day et al. (2018), and for neuroticism  
172 using summary statistics from Nagel et al. (2018), excluding SNPs with an INFO score  $< 0.9$  in the  
173 discovery sample. PGS were calculated for 10 p-value thresholds (PT:  $5 \times 10^{-8}$ ,  $1 \times 10^{-6}$ ,  $1 \times 10^{-4}$ , 0.001,  
174 0.01, 0.05, 0.1, 0.2, 0.5 and 1.0; see Supplementary Table S1 for number of included SNPs). There was  
175 no sample overlap of the discovery samples with sample 1.

176 PRSice2 (Choi & O'Reilly, 2019) was used to calculate logistic regression models with case-control  
177 status as the dependent variable, and loneliness-PGS as a predictor of interest and the first 5 ancestry  
178 principal components (PC1–PC5) as covariates. The effect size measure, Nagelkerke's pseudo- $R^2$   
179 ( $NkR^2$ ), was calculated as  $R^2$  increase when adding the PGS to a model only containing the covariates.

## 180 **2.2 Sample 2**



### 181 **2.2.1 Sample Characteristics**

182 A total of 448 female adult individuals who passed genetic quality control were included in the present  
183 analysis, 187 of whom met DSM-IV criteria for BPD (age  $M = 29.35$ ,  $SD = 7.69$ ) and 261 were healthy  
184 controls (HC, age  $M = 27.56$ ,  $SD = 6.94$ ). Participants of the BPD group were slightly older ( $t = -2.58$ ,  $p$   
185  $= .010$ ,  $d = -.25$ ). Data on childhood traumatization was available for subsample of 409 participants  
186 (169 BPD, 240 HC), and data on loneliness for 290 individuals (155 BPD, 135 HC). For 276 subjects (144  
187 BPD, 132 HC), both were available. Recruitment was carried out by the central project of the KFO 256,  
188 which is a clinical research unit funded by the German Research Foundation (DFG) dedicated to  
189 investigating mechanisms of disturbed emotion processing in BPD (Schmahl et al., 2014). The diagnosis  
190 of BPD according to DSM-IV was made by trained clinical psychologists using the International  
191 Personality Disorder Examination (IPDE; Loranger, 1999). All patients met at least five of the nine DSM-  
192 IV criteria for BPD.

193 General exclusion criteria were a lifetime history of psychotic or bipolar I disorder, current substance  
194 addiction, current pregnancy, history of organic brain disease, skull or brain damage, severe  
195 neurological illness or psychotropic medication at the time of the testing as well as a positive urine  
196 toxicology screen for illicit drugs. Additional exclusion criteria for the healthy controls were any lifetime  
197 or current psychiatric diagnoses.

198 The study was conducted in accordance with the Declaration of Helsinki and was approved by the  
199 Research Ethics Board of the University of Heidelberg. Subjects provided written informed consent  
200 prior to study participation.

### 201 **2.2.2 Measures**

202 **Loneliness.** Loneliness, that is the subjective experience of social isolation, was assessed using the  
203 Revised University of California Los Angeles Loneliness Scale (ULS-R; Russell, Peplau, & Cutrona, 1980;  
204 German version: Döring & Bortz, 1993). The ULS-R consists of 20 items that are rated on a 5-point  
205 Likert scale (range: 1 'not at all' to 5 'totally') combined in a sum score (range: 20–100) with higher

206 scores indicating higher levels of loneliness. Internal consistency for the ULS-R was  $\alpha = .972$  (BPD:  
207 Cronbach's  $\alpha = .938$ ; HCs: Cronbach's  $\alpha = .886$ ).

208 **Childhood Maltreatment.** Severity of childhood trauma was assessed using the short form of the  
209 Childhood Trauma Questionnaire (CTQ-SF; Bernstein et al., 2003; German version: Klinitzke, Romppel,  
210 Häuser, Brähler, & Glaesmer, 2011). Subjects rated the frequency of maltreatment in childhood and  
211 adolescence in 25 items using a 5-point Likert scale (range: 1 'not at all' to 5 'very often'), with sum-  
212 scores ranging from 25 to 125. Internal consistency for the CTQ-SF was  $\alpha = .954$  (BPD: Cronbach's  $\alpha =$   
213  $.930$ ; HCs: Cronbach's  $\alpha = .873$ ).

### 214 **2.2.3 Genotyping, quality control and imputation**

215 DNA was extracted from peripheral blood samples using automated DNA extraction with the chemagic  
216 Magnetic Separation Module I (Chemagen Biopolymer-Technologie, Baesweiler, Germany). All  
217 samples were genotyped using Illumina InfiniumGlobal Screening Arrays (Illumina, San Diego, CA,  
218 USA).

219 Genetic quality control and imputation for sample 2 was carried out in the frame of a larger ongoing  
220 BPD GWAS study (Witt et al., 2022), and was done as described for sample 1. For the present analyses,  
221 the subjects from sample 2 were extracted from the larger data set, and homogeneity of the dataset  
222 was ensured by excluding subjects  $> |4.5|$  SD on the first 20 PCs.

### 223 **2.2.4 Polygenic Scores**

224 PGS for loneliness and neuroticism were calculated and tested for association with case-control status  
225 using PRSice2 as described for sample 1. There was no sample overlap of the discovery samples with  
226 sample 2. The number of included SNPs for each p-value threshold are shown in Supplementary Table  
227 S1.

### 228 **2.2.5 Statistical Analysis**

229 The loneliness-PGS which showed the strongest association with case-control status in sample 2,  $PT =$   
230  $0.1$ , was selected for further analyses in the sample. To analyse the relationship between self-reported  
231 loneliness and the loneliness-PGS, we calculated multiple linear regression analysis with the

232 loneliness-PGS as predictor and ULS-R score as dependent variable, controlling for the target cohort's  
233 specific principal components (PC1–PC5). To examine whether the loneliness-PGS moderates the  
234 association of the severity of childhood maltreatment and the ULS-R score in the BPD group, a  
235 moderation analysis with z-standardized predictors was performed using the PROCESS macro by Hayes  
236 (2017), which uses ordinary least squares regression, yielding unstandardized coefficients for all  
237 effects. Bootstrapping with 5000 samples together with heteroscedasticity consistent standard errors  
238 (HC3; Davidson & MacKinnon, 1993) were employed to compute the confidence intervals. In all  
239 analyses, the first five PCs were included as covariates to control for population stratification. In  
240 addition, the PGS for neuroticism (neuroticism-PGS) was included as a covariate in a second step in  
241 order to control for its often reported association to BPD and loneliness (Abdellaoui, Chen, et al., 2019).

## 242 **3 Results**

### 243 **3.1 Genetic correlation**

244 In the LD-score regression analysis, BPD showed a positive genetic correlation with loneliness ( $r_g =$   
245  $.23$  (95% CI:  $.046 - .42$ );  $p = .015$ ).

### 246 **3.2 PGS association with case-control status**

247 Loneliness-PGS showed a positive association with BPD case-control status: higher loneliness-PGS  
248 were observed in the BPD cases (see Figure 1, details see Supplementary Tables S2-S7). For sample 1,  
249 the strongest association was observed for the PT = 0.5 ( $NkR^2 = 2.3\%$ ,  $p = 2.7 \times 10^{-12}$ ), and the association  
250 was replicated in sample 2 (PT = 0.1,  $NkR^2 = 6.6\%$ ,  $p = 4.4 \times 10^{-6}$ ). When adding the best fit neuroticism-  
251 PGS (both studies PT = 0.1) as a covariate, a reduced  $NkR^2$  was observed, but the association remained  
252 significant (sample 1: PT = 0.5,  $NkR^2 = 0.6\%$ ,  $p = 0.00019$ ; sample 2: PT = 0.1,  $NkR^2 = 2.7\%$ ,  $p = 0.0021$ ).

253

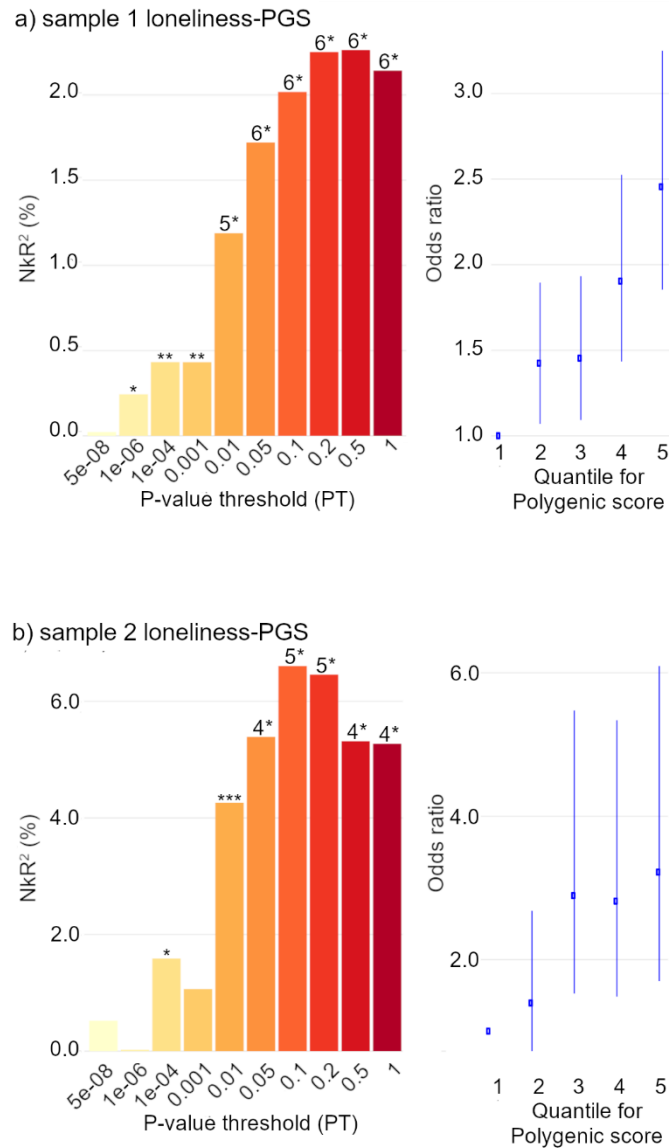

254

255 *Fig. 1: Association of Loneliness Polygenic Scores (loneliness-PGS) with Borderline Personality Disorder*  
 256 *case-control status.* Left panel: Nagelkerke’s R<sup>2</sup> describing explained variance in case-control status by PGS  
 257 at ten P-value thresholds. Right panel: Odds ratio for case-control status depicted by loneliness-PGS  
 258 quintile, with the first quintile as reference, depicted for the most strongly associated PT. Loneliness-PGS  
 259 was based on Day et al. (2017). The number of SNPs included in the PGS are shown in Table 1. \*  $p < 0.05$ ;  
 260 \*\*  $p < 0.005$ ; \*\*\*  $p < 0.001$ ; 4\*  $p < 1 \times 10^{-4}$ ; 5\*  $p < 1 \times 10^{-5}$ ; 6\*  $p < 1 \times 10^{-8}$

261

262 **3.3 Prediction of loneliness by loneliness-PGS**

263 BPD patients reported a higher level of loneliness than HC ( $t = -4.85, p < .001, d = -0.465$ ). Multiple  
 264 linear regression analyses revealed that the loneliness-PGS and PCs predicted 5.8% of the variance of

265 the ULS-R score across groups ( $F(6, 283) = 2.92, p = .009$ , adjusted  $R^2 = .038$ ), with the loneliness-PGS  
266 as the only significant predictor ( $\beta = .185, p = .002$ , Figure 2). This finding remained significant when  
267 we additionally controlled for the neuroticism-PGS ( $F(7, 282) = 3.46, p = .001$ , adjusted  $R^2 = .056, \beta =$   
268  $.126, p = .046$ ). Separate analyses for the BPD and HC group revealed no significant relationship within  
269 the subgroups (BPD:  $F(6, 148) = 1.24, p = .287$ ; HC:  $F(6, 128) = 1.05, p = .396$ , additionally controlled for  
270 neuroticism-PGS BPD:  $F(7, 147) = 1.06, p = .390$ ; HC:  $F(7, 127) = 0.89, p = .513$ ).  
271

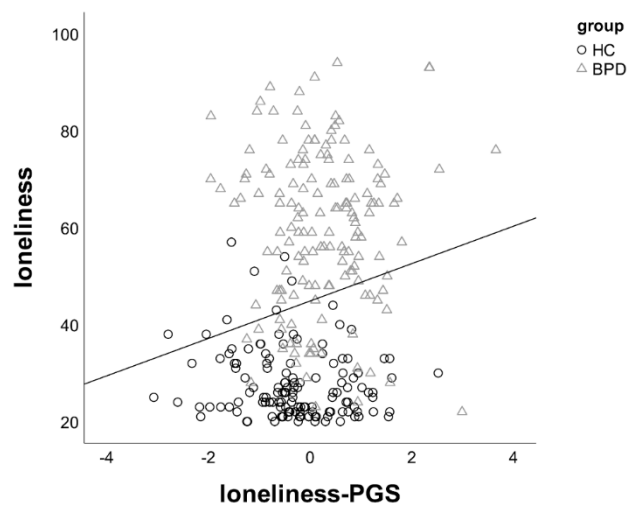

272  
273 *Fig. 2. Association between the standardized loneliness-PGS and loneliness assessed with the ULS-R in HC*  
274 *and BPD.*

275  
276 **3.4 Exploring loneliness-PGS as a potential modulating factor of the association between childhood**  
277 **traumatization and loneliness in BPD**

278 To analyse the role of the genetic risk for loneliness as a vulnerability factor that might affect, whether  
279 a higher childhood traumatization associates with a higher level of loneliness, moderation analysis was  
280 applied for the BPD group. The overall model was not significant,  $F(8, 135) = 1.712, p = .101, R^2 = .103$ .  
281 Results show that the loneliness-PGS did not moderate the effect between CTQ and loneliness,  
282  $\Delta R^2 = .004, F(1, 135) = 0.458, p = .500, 95\% \text{ CI}[-2.484; 5.067]$ . This did not change with the addition of

283 the Neuroticism-PGS (overall  $F(9,134) = 1.506, p = .152, R^2 = .104$ ; no interaction effect:  
284  $F(1, 134) = 0.452, p = .503, \Delta R^2 = .004, 95\% CI[-2.483; 5.038]$ ; Table 1).

285

286 **Table 1**

287 *Prediction of loneliness by childhood maltreatment and Loneliness-PGS*

|                    | $\beta$ | SE    | t      | p      |
|--------------------|---------|-------|--------|--------|
| intercept          | 59.071  | 1.386 | 42.620 | < .001 |
| CTQ                | 3.581   | 1.523 | 2.351  | .020   |
| loneliness-PGS     | -0.685  | 1.453 | -0.471 | .638   |
| CTQ*loneliness-PGS | 1.278   | 1.901 | 0.672  | .503   |
| PC1                | -2.397  | 1.342 | -1.786 | .076   |
| PC2                | -0.979  | 1.520 | -0.644 | .520   |
| PC3                | -0.559  | 1.517 | -0.369 | .713   |
| PC4                | -0.855  | 1.378 | -0.621 | .536   |
| PC5                | -2.302  | 1.467 | -1.570 | .119   |
| neuroticism-PGS    | 0.319   | 1.288 | 0.248  | .605   |

288 *Note.* Predictors were z-standardized, PGS = polygenic score, CTQ = childhood trauma questionnaire

289

290 **4 Discussion**

291 The aims of the present study were to test a possible genetic overlap between loneliness and BPD, to  
292 test whether a higher genetic risk for loneliness is associated with higher loneliness experienced by  
293 BPD patients, and to test whether the genetic risk for loneliness modulates the relationship of the  
294 severity of childhood maltreatment and experienced loneliness in BPD. Therefore, we examined  
295 genetic and self-report questionnaire data of patients with a clinical confirmed diagnosis of BPD and  
296 HC. We found evidence for a genetic overlap of BPD and loneliness, indicated by the genetic correlation  
297 of the two GWAS, and the higher loneliness-PGS in the BPD groups in both samples. In addition, a  
298 higher loneliness-PGS was associated with higher loneliness in the sample 2, but did not moderate the  
299 relationship between childhood maltreatment and loneliness. The associations remained even when  
300 controlling for the neuroticism-PGS, indicating that the genetic bridge between BPD and loneliness is  
301 partly but not only explained by a genetic propensity towards neuroticism as an anxious personality  
302 trait.

303 The observed genetic correlation of loneliness and BPD and the positive association of the loneliness-  
304 PGS with BPD case-control status in the GWAS sample and in an independent sample indicate that the

305 genetic factors contributing to BPD risk and to variation in loneliness in the general population are  
306 partially shared. This is in line with former findings of a genetic association of borderline personality  
307 features and loneliness in a twin study (Schermer et al., 2020). Together with repeated findings on  
308 increased levels of loneliness and smaller social networks in BPD (Liebke et al., 2017; Nenov-Matt et  
309 al., 2020), this finding underlines the relevance of loneliness in the context of BPD. The fact that a  
310 genetic correlation has already been shown for several other somatic and psychiatric diseases  
311 (Abdellaoui, Sanchez-Roige, et al., 2019), supports prior research assuming loneliness as a  
312 transdiagnostically relevant risk factor (Holt-Lunstad et al., 2015; Mushtaq et al., 2014; Pengpid &  
313 Peltzer, 2021).

314 Across both groups, we found loneliness-PGS as a positive predictor of self-reported loneliness,  
315 pointing towards the relevance of a genetic vulnerability for loneliness. The small effect size suggests  
316 that other components such as actual social isolation are important factors. That this association was  
317 not significant in the subgroups could be due to the fact that HCs and BPD represent extreme groups  
318 regarding experienced loneliness, showing reduced within-group but strong between-group variance.  
319 This suggests the need for further studies that enroll participants in both groups varying more broadly  
320 in the level of loneliness. Additionally, the measures to assess loneliness differed between the GWAS  
321 study by Day et al. (2018), applying a 3 variable measure more strongly reflecting the frequency of  
322 actual social interaction, and sample 2, where subjective feelings of loneliness were assessed with the  
323 20 item UCLA-R scale. This difference in operationalization could also partially explain the lack of  
324 association in the subgroups. Future studies on the loneliness-PGS should therefore take a more  
325 differentiated look at quantity and quality of social relationships.

326 In contrast to our hypothesis, the association of the severity of childhood maltreatment and reported  
327 loneliness was not moderated by the loneliness-PGS in the BPD group. While this suggests that that  
328 there are no interacting contributions of genetics and childhood maltreatment to subjective  
329 experienced loneliness, the lack of evidence may also have been caused by a lack of power due to the  
330 rather small sample.

#### 331 **4.1 Limitations**

332 The present study has some limitations. First, due to the overrepresentation of women with BPD in  
333 the health care system, our results are largely based on female subjects. In sample 1, 92% of the BPD  
334 cases were female, and sample 2 consists of female participants only. Additionally, both samples were  
335 of central European ancestry. Therefore the generalisability is limited and replication in male or more  
336 balanced samples, and samples of other ancestries are needed.

337 Second, as already mentioned, our sample size was rather small for the investigation of the often small  
338 genetic effects. In this regard, we consider it a strength of the study, that the evidence for a shared  
339 genetic contribution to BPD and loneliness was replicated over different methods (LD-score regression  
340 and PGS analyses) and two independent samples. However, especially for the more detailed analyses  
341 in sample 2, there is need for studies replicating or extending those findings in larger samples. Larger  
342 samples would possibly allow to find effects that we could not confirm with our sample. Concurrently,  
343 larger GWAS samples, particularly for BPD, are warranted and would allow for more accurate  
344 estimations of genetic correlations, and more detailed biostatistical analyses of the shared genetics of  
345 loneliness and BPD, e.g. using methods taking both variants with equidirectional and opposing effects  
346 effect into account (Smeland et al., 2020), or applying methods such as Mendelian randomisation to  
347 allow for inference of causality (Burgess, Butterworth, & Thompson, 2013).

348 Third, as a self-report questionnaire, the CTQ represents a retrospective assessment of childhood  
349 experiences rather than an objective description of the exposure and experiences of adverse childhood  
350 experiences (Baldwin, Reuben, Newbury, & Danese, 2019). That should be considered in the  
351 interpretation of effects of childhood maltreatment and emphasizes the need for studies with  
352 prospective designs. Moreover, the measurement of the chronicity of loneliness might be the more  
353 appropriate tool to capture an association with genetic predispositions. Although the ULS-R is the most  
354 established instrument for measuring loneliness, originally conceptualized as a trait measure, it has  
355 been shown that most often it varies across time influenced by an individual's current state instead of  
356 being exclusively a trait (Martín-María et al., 2021).



357 **4.2 Conclusion**

358 Despite the limitations mentioned above, our study is, as far as we know, the first study using genome-  
359 wide genetic data to link the polygenic propensity for loneliness to BPD, finding evidence for an  
360 association in two independent samples. Further studies and larger samples are needed to further  
361 dissect the genetic overlap, investigate possible effects of different types of childhood maltreatment  
362 interacting with the loneliness-PGS and address whether the association is specific for BPD or reflects  
363 a transdiagnostically relevant association.

364 **5 Acknowledgements**

365 We thank all participants involved in the study.

366 **6 Funding**

367 This project was funded by the German Research Foundation (KFO-256 and GRK2350/3 – 324164820).

368 **7 Ethical Standards**

369 The authors assert that all procedures contributing to this work comply with the ethical standards of  
370 the relevant national and institutional committees on human experimentation and with the Helsinki  
371 Declaration of 1975, as revised in 2008. The work was approved by the ethics committees of all  
372 participating institutions.

373 **8 Competing interests**

374 The authors declare none.

375

## 376 References

- 377 Abdellaoui, A., Chen, H. Y., Willemsen, G., Ehli, E. A., Davies, G. E., Verweij, K. J., . . . Cacioppo, J. T.  
378 (2019). Associations between loneliness and personality are mostly driven by a genetic  
379 association with neuroticism. *Journal of personality*, *87*(2), 386-397. doi:10.1111/jopy.12397
- 380 Abdellaoui, A., Sanchez-Roige, S., Sealock, J., Treur, J. L., Dennis, J., Fontanillas, P., . . . Ip, H. F. (2019).  
381 Phenome-wide investigation of health outcomes associated with genetic predisposition to  
382 loneliness. *Human molecular genetics*, *28*(22), 3853-3865. doi:10.1093/hmg/ddz219
- 383 Andreassen, O. A., Hindley, G. F., Frei, O., & Smeland, O. B. (2023). New insights from the last decade  
384 of research in psychiatric genetics: discoveries, challenges and clinical implications. *World*  
385 *Psychiatry*, *22*(1), 4-24. doi:10.1002/wps.21034
- 386 American Psychiatric Association. (2013). *Diagnostic and statistical manual of mental disorders: DSM-*  
387 *5* (Vol. 5): American psychiatric association Washington, DC.
- 388 Baldwin, J. R., Reuben, A., Newbury, J. B., & Danese, A. (2019). Agreement between prospective and  
389 retrospective measures of childhood maltreatment: a systematic review and meta-analysis.  
390 *JAMA psychiatry*, *76*(6), 584-593. doi:10.1001/jamapsychiatry.2019.0097
- 391 Bernstein, D. P., Stein, J. A., Newcomb, M. D., Walker, E., Pogge, D., Ahluvalia, T., . . . Desmond, D.  
392 (2003). Development and validation of a brief screening version of the Childhood Trauma  
393 Questionnaire. *Child abuse & neglect*, *27*(2), 169-190. doi:10.1016/S0145-2134(02)00541-0
- 394 Boomsma, D. I., Willemsen, G., Dolan, C. V., Hawkey, L. C., & Cacioppo, J. T. (2005). Genetic and  
395 environmental contributions to loneliness in adults: The Netherlands Twin Register Study.  
396 *Behavior genetics*, *35*, 745-752. doi:10.1007/s10519-005-6040-8
- 397 Buecker, S., Maes, M., Denissen, J. J., & Luhmann, M. (2020). Loneliness and the Big Five personality  
398 traits: A meta-analysis. *European Journal of Personality*, *34*(1), 8-28. doi:10.1002/per.2229
- 399 Bulik-Sullivan, B. K., Loh, P.-R., Finucane, H. K., Ripke, S., Yang, J., Consortium, S. W. G. o. t. P. G., . . .  
400 Neale, B. M. (2015). LD Score regression distinguishes confounding from polygenicity in  
401 genome-wide association studies. *Nature genetics*, *47*(3), 291-295. doi:10.1038/ng.3211
- 402 Burgess, S., Butterworth, A., & Thompson, S. G. (2013). Mendelian randomization analysis with  
403 multiple genetic variants using summarized data. *Genetic epidemiology*, *37*(7), 658-665.  
404 doi:10.1002/gepi.21758
- 405 Cacioppo, J. T., Cacioppo, S., & Boomsma, D. I. (2014). Evolutionary mechanisms for loneliness.  
406 *Cognition & emotion*, *28*(1), 3-21. doi:10.1080/02699931.2013.837379
- 407 Cacioppo, J. T., Ernst, J. M., Burleson, M. H., McClintock, M. K., Malarkey, W. B., Hawkey, L. C., . . .  
408 Hugdahl, K. (2000). Lonely traits and concomitant physiological processes: The MacArthur  
409 social neuroscience studies. *International Journal of Psychophysiology*, *35*(2-3), 143-154.  
410 doi:10.1016/S0167-8760(99)00049-5
- 411 Choi, S. W., & O'Reilly, P. F. (2019). PRSice-2: Polygenic Risk Score software for biobank-scale data.  
412 *Gigascience*, *8*(7), giz082. doi:10.1093/gigascience/giz082
- 413 Coleman, J. R., Peyrot, W. J., Purves, K. L., Davis, K. A., Rayner, C., Choi, S. W., . . . Van der Auwera, S.  
414 (2020). Genome-wide gene-environment analyses of major depressive disorder and reported  
415 lifetime traumatic experiences in UK Biobank. *Molecular psychiatry*, *25*(7), 1430-1446.  
416 doi:10.1038/s41380-019-0546-6
- 417 Colodro-Conde, L., Cuvy-Duchesne, B., Zhu, G., Coventry, W. L., Byrne, E. M., Gordon, S., . . . Ripke, S.  
418 (2018). A direct test of the diathesis-stress model for depression. *Molecular psychiatry*, *23*(7),  
419 1590-1596. doi:10.1038/mp.2017.130

- 420 Das, S., Forer, L., Schönherr, S., Sidore, C., Locke, A. E., Kwong, A., . . . McGue, M. (2016). Next-  
421 generation genotype imputation service and methods. *Nature genetics*, *48*(10), 1284-1287.  
422 doi:10.1038/ng.3656
- 423 Davidson, R., & MacKinnon, J. G. (1993). *Estimation and inference in econometrics* (Vol. 63): Oxford  
424 New York.
- 425 Day, F., Ong, K., & Perry, J. (2018). Elucidating the genetic basis of social interaction and isolation.  
426 *Nature communications*, *9*(1), 2457. doi:10.1038/s41467-018-04930-1
- 427 Distel, M. A., Rebollo-Mesa, I., Abdellaoui, A., Derom, C. A., Willemsen, G., Cacioppo, J. T., & Boomsma,  
428 D. I. (2010). Familial resemblance for loneliness. *Behavior genetics*, *40*, 480-494.  
429 doi:10.1007/s10519-010-9341-5
- 430 Döring, N., & Bortz, J. (1993). Psychometrische Einsamkeitsforschung: Deutsche Neukonstruktion der  
431 UCLA Loneliness Scale. *Diagnostica*.
- 432 Gale, C. R., Hagenaars, S. P., Davies, G., Hill, W. D., Liewald, D. C., Cullen, B., . . . McIntosh, A. M. (2016).  
433 Pleiotropy between neuroticism and physical and mental health: findings from 108 038 men  
434 and women in UK Biobank. *Translational psychiatry*, *6*(4), e791-e791. doi:10.1038/tp.2016.56
- 435 Gibson, R. L., & Hartshorne, T. S. (1996). Childhood sexual abuse and adult loneliness and network  
436 orientation. *Child abuse & neglect*, *20*(11), 1087-1093. doi:10.1016/0145-2134(96)00097-x
- 437 Hauschild, S., Winter, D., Thome, J., Liebke, L., Schmahl, C., Bohus, M., & Lis, S. (2018). Behavioural  
438 mimicry and loneliness in borderline personality disorder. *Comprehensive Psychiatry*, *82*, 30-  
439 36. doi:10.1016/j.comppsy.2018.01.005
- 440 Hayes, A. F. (2017). *Introduction to mediation, moderation, and conditional process analysis: A*  
441 *regression-based approach*: Guilford publications.
- 442 Holt-Lunstad, J., Smith, T. B., Baker, M., Harris, T., & Stephenson, D. (2015). Loneliness and social  
443 isolation as risk factors for mortality: a meta-analytic review. *Perspectives on psychological*  
444 *science*, *10*(2), 227-237. doi:10.1177/1745691614568352
- 445 Kleindienst, N., Vonderlin, R., Bohus, M., & Lis, S. (2021). Childhood adversity and borderline  
446 personality disorder. Analyses complementing the meta-analysis by Porter et al. (2020). *Acta*  
447 *Psychiatr Scand*, *143*(2), 183-184. doi:10.1111/acps.13256
- 448 Klinitzke, G., Romppel, M., Häuser, W., Brähler, E., & Glaesmer, H. (2011). The German Version of the  
449 Childhood Trauma Questionnaire (CTQ): psychometric characteristics in a representative  
450 sample of the general population. *Psychotherapie, Psychosomatik, Medizinische Psychologie*,  
451 *62*(2), 47-51. doi:10.1055/s-0031-1295495
- 452 Liebke, L., Bungert, M., Thome, J., Hauschild, S., Gescher, D. M., Schmahl, C., . . . Lis, S. (2017).  
453 Loneliness, social networks, and social functioning in borderline personality disorder.  
454 *Personality Disorders: Theory, Research, and Treatment*, *8*(4), 349. doi:10.1037/per0000208
- 455 Loh, P.-R., Danecek, P., Palamara, P. F., Fuchsberger, C., A Reshef, Y., K Finucane, H., . . . Abecasis, G. R.  
456 (2016). Reference-based phasing using the Haplotype Reference Consortium panel. *Nature*  
457 *genetics*, *48*(11), 1443-1448. doi:10.1038/ng.3679
- 458 Loranger, A. W. (1999). *International personality disorder examination: IPDE; DSM-IV and ICD-10;*  
459 *interviews*: Psychological Assessment Resources.
- 460 Lubke, G., Laurin, C., Amin, N., Hottenga, J. J., Willemsen, G., van Grootheest, G., . . . Van Duijn, C.  
461 (2014). Genome-wide analyses of borderline personality features. *Molecular psychiatry*, *19*(8),  
462 923-929. doi:10.1038/mp.2013.109
- 463 Martín-María, N., Caballero, F. F., Lara, E., Domènech-Abella, J., Haro, J. M., Olaya, B., . . . Miret, M.  
464 (2021). Effects of transient and chronic loneliness on major depression in older adults: A

- 465 longitudinal study. *International journal of geriatric psychiatry*, 36(1), 76-85.  
466 doi:10.1002/gps.5397
- 467 Matthews, T., Danese, A., Wertz, J., Odgers, C. L., Ambler, A., Moffitt, T. E., & Arseneault, L. (2016).  
468 Social isolation, loneliness and depression in young adulthood: a behavioural genetic analysis.  
469 *Social psychiatry and psychiatric epidemiology*, 51, 339-348. doi:10.1007/s00127-016-1178-7
- 470 Meuldijk, D., McCarthy, A., Bourke, M. E., & Grenyer, B. F. (2017). The value of psychological treatment  
471 for borderline personality disorder: Systematic review and cost offset analysis of economic  
472 evaluations. *PloS one*, 12(3), e0171592. doi:10.1371/journal.pone.0171592
- 473 Mushtaq, R., Shoib, S., Shah, T., & Mushtaq, S. (2014). Relationship between loneliness, psychiatric  
474 disorders and physical health? A review on the psychological aspects of loneliness. *Journal of*  
475 *clinical and diagnostic research: JCDR*, 8(9), WE01. doi:10.7860/JCDR/2014/10077.4828
- 476 Nagel, M., Jansen, P. R., Stringer, S., Watanabe, K., De Leeuw, C. A., Bryois, J., . . . Muñoz-Manchado,  
477 A. B. (2018). Meta-analysis of genome-wide association studies for neuroticism in 449,484  
478 individuals identifies novel genetic loci and pathways. *Nature genetics*, 50(7), 920-927.  
479 doi:10.1038/s41588-018-0151-7
- 480 Nenov-Matt, T., Barton, B. B., Dewald-Kaufmann, J., Goerigk, S., Rek, S., Zentz, K., . . . Reinhard, M. A.  
481 (2020). Loneliness, social isolation and their difference: a cross-diagnostic study in persistent  
482 depressive disorder and borderline personality disorder. *Frontiers in Psychiatry*, 11, 608476.  
483 doi:10.3389/fpsyt.2020.608476
- 484 Pengpid, S., & Peltzer, K. (2021). Associations of loneliness with poor physical health, poor mental  
485 health and health risk behaviours among a nationally representative community-dwelling  
486 sample of middle-aged and older adults in India. *International journal of geriatric psychiatry*,  
487 36(11), 1722-1731. doi:10.1002/gps.5592
- 488 Peplau, L., & Perlman, D. (1982). *Loneliness: A sourcebook of current theory, research and therapy* (Vol.  
489 36): John Wiley & Sons Incorporated.
- 490 Porter, C., Palmier-Claus, J., Branitsky, A., Mansell, W., Warwick, H., & Varese, F. (2020). Childhood  
491 adversity and borderline personality disorder: a meta-analysis. *Acta Psychiatrica Scandinavica*,  
492 141(1), 6-20. doi:10.1111/acps.13118
- 493 Russell, D., Peplau, L. A., & Cutrona, C. E. (1980). The revised UCLA Loneliness Scale: concurrent and  
494 discriminant validity evidence. *Journal of personality and social psychology*, 39(3), 472.  
495 doi:10.1037//0022-3514.39.3.472
- 496 Sagan, O. (2017). The loneliness of personality disorder: a phenomenological study. *Mental health and*  
497 *social inclusion*, 21(4), 213-221. doi:10.1108/MHSI-04-2017-0020
- 498 Schermer, J. A., Colodro-Conde, L., Grasby, K. L., Hickie, I. B., Burns, J., Lighthart, L., . . . Boomsma, D. I.  
499 (2020). Genetic and environmental causes of individual differences in borderline personality  
500 disorder features and loneliness are partially shared. *Twin Research and Human Genetics*,  
501 23(4), 214-220. doi:10.1017/thg.2020.62
- 502 Schmahl, C., Herpertz, S. C., Bertsch, K., Ende, G., Flor, H., Kirsch, P., . . . Schneider, M. (2014).  
503 Mechanisms of disturbed emotion processing and social interaction in borderline personality  
504 disorder: state of knowledge and research agenda of the German Clinical Research Unit.  
505 *Borderline Personality Disorder and Emotion Dysregulation*, 1(1), 1-17. doi:10.1186/2051-  
506 6673-1-12
- 507 Sheikh, M. A. (2018). Childhood physical maltreatment, perceived social isolation, and internalizing  
508 symptoms: a longitudinal, three-wave, population-based study. *European Child & Adolescent*  
509 *Psychiatry*, 27(4), 481-491. doi:10.1007/s00787-017-1090-z

- 510 Shevlin, M., McElroy, E., & Murphy, J. (2015). Loneliness mediates the relationship between childhood  
511 trauma and adult psychopathology: Evidence from the adult psychiatric morbidity survey.  
512 *Social psychiatry and psychiatric epidemiology*, *50*, 591-601. doi:10.1007/s00127-014-0951-8
- 513 Shih, R. A., Belmonte, P. L., & Zandi, P. P. (2004). A review of the evidence from family, twin and  
514 adoption studies for a genetic contribution to adult psychiatric disorders. *International review*  
515 *of psychiatry*, *16*(4), 260-283. doi:10.1080/09540260400014401
- 516 Skaug, E., Czajkowski, N. O., Waaktaar, T., & Torgersen, S. (2022). The role of sense of coherence and  
517 loneliness in borderline personality disorder traits: a longitudinal twin study. *Borderline*  
518 *Personality Disorder and Emotion Dysregulation*, *9*(1), 19. doi:10.1186/s40479-022-00190-0
- 519 Skoglund, C., Tiger, A., Rück, C., Petrovic, P., Asherson, P., Hellner, C., . . . Kuja-Halkola, R. (2021).  
520 Familial risk and heritability of diagnosed borderline personality disorder: a register study of  
521 the Swedish population. *Molecular psychiatry*, *26*(3), 999-1008. doi:10.1038/s41380-019-  
522 0442-0
- 523 Smeland, O. B., Bahrami, S., Frei, O., Shadrin, A., O'Connell, K., Savage, J., . . . Steen, N. E. (2020).  
524 Genome-wide analysis reveals extensive genetic overlap between schizophrenia, bipolar  
525 disorder, and intelligence. *Molecular psychiatry*, *25*(4), 844-853. doi:10.1038/s41380-018-  
526 0332-x
- 527 Streit, F., Witt, S. H., Awasthi, S., Foo, J. C., Jungkunz, M., Frank, J., . . . Maslahati, T. (2022). Borderline  
528 personality disorder and the big five: molecular genetic analyses indicate shared genetic  
529 architecture with neuroticism and openness. *Translational psychiatry*, *12*(1), 153.  
530 doi:10.1038/s41398-022-01912-2
- 531 Thome, J., Liebke, L., Bungert, M., Schmahl, C., Domes, G., Bohus, M., & Lis, S. (2016). Confidence in  
532 facial emotion recognition in borderline personality disorder. *Personality Disorders: Theory,*  
533 *Research, and Treatment*, *7*(2), 159. doi:10.1037/per0000142
- 534 Torgersen, S., Lygren, S., Øien, P. A., Skre, I., Onstad, S., Edvardsen, J., . . . Kringlen, E. (2000). A twin  
535 study of personality disorders. *Comprehensive Psychiatry*, *41*(6), 416-425.  
536 doi:10.1053/comp.2000.16560
- 537 Trull, T. J., Jahng, S., Tomko, R. L., Wood, P. K., & Sher, K. J. (2010). Revised NESARC personality disorder  
538 diagnoses: gender, prevalence, and comorbidity with substance dependence disorders.  
539 *Journal of personality Disorders*, *24*(4), 412-426. doi:10.1521/pedi.2010.24.4.412
- 540 Witt, S., Awasthi, S., Rietschel, M., Ripke, S., Streit, F., & Consortium, I. B. G. (2022). 45. GENOME-WIDE  
541 ASSOCIATION STUDY OF BORDERLINE PERSONALITY DISORDER-AN UPDATE FROM THE  
542 INTERNATIONAL BORDERLINE GENOMICS CONSORTIUM. *European*  
543 *Neuropsychopharmacology*, *63*, e69. doi:10.1016/j.euroneuro.2022.07.133
- 544 Witt, S., Streit, F., Jungkunz, M., Frank, J., Awasthi, S., Reinbold, C., . . . Heilmann-Heimbach, S. (2017).  
545 Genome-wide association study of borderline personality disorder reveals genetic overlap  
546 with bipolar disorder, major depression and schizophrenia. *Translational psychiatry*, *7*(6),  
547 e1155-e1155. doi:10.1038/tp.2017.115
- 548 Wray, N. R., Lee, S. H., Mehta, D., Vinkhuyzen, A. A., Dudbridge, F., & Middeldorp, C. M. (2014).  
549 Research review: polygenic methods and their application to psychiatric traits. *Journal of child*  
550 *psychology and psychiatry*, *55*(10), 1068-1087. doi:10.1111/jcpp.12295
- 551 Zanarini, M. C., Frankenburg, F. R., Reich, D. B., & Fitzmaurice, G. M. (2016). Fluidity of the  
552 subsyndromal phenomenology of borderline personality disorder over 16 years of prospective  
553 follow-up. *American Journal of Psychiatry*, *173*(7), 688-694.  
554 doi:10.1176/appi.ajp.2015.15081045

555 Zonarini, M. C., Frankenburg, F. R., Reich, D. B., Silk, K. R., Hudson, J. I., & McSweeney, L. B. (2007). The  
556 subsyndromal phenomenology of borderline personality disorder: a 10-year follow-up study.  
557 *American Journal of Psychiatry*, 164(6), 929-935. doi:10.1176/ajp.2007.164.6.929

558

## Supplementary Material

559

### 560 **Table S1**

561 *Number of SNPs included in PGS*

| PT                 | <i>loneliness</i> |          | <i>neuroticism</i> |          |
|--------------------|-------------------|----------|--------------------|----------|
|                    | sample 1          | sample 2 | sample 1           | sample 2 |
| 5x10 <sup>-8</sup> | 11                | 12       | 128                | 118      |
| 1x10 <sup>-6</sup> | 36                | 37       | 275                | 248      |
| 0.0001             | 366               | 343      | 1183               | 1167     |
| 0.001              | 1363              | 1405     | 3056               | 3022     |
| 0.01               | 5730              | 6063     | 8696               | 8918     |
| 0.05               | 15,398            | 16,795   | 19,658             | 20,775   |
| 0.1                | 24,527            | 26,996   | 28,347             | 30,379   |
| 0.2                | 36,951            | 41,098   | 40,422             | 44,142   |
| 0.5                | 61,616            | 68,989   | 62,962             | 69,857   |
| 1                  | 79,697            | 90,449   | 78,434             | 88,317   |

562 *Note.* Number of SNPs included for the calculation of polygenic scores (PGS) for loneliness and neuroticism  
563 at the different p-value thresholds, shown for both samples. SNP = single nucleotide polymorphism; PT = p-  
564 value threshold, PGS = polygenic score

565

566

### 567 **Table S2**

568 *Prediction of BPD case-control status by Loneliness-PGS in sample 1*

| <i>Threshold</i> | <i>R<sup>2</sup></i> | <i>P</i> | <i>Coefficient</i> | <i>Standard.Error</i> | <i>Num_SNP</i> |
|------------------|----------------------|----------|--------------------|-----------------------|----------------|
| 5,00E-08         | 0,02%                | 0,485134 | 53,9157            | 77,2355               | 11             |
| 1,00E-06         | 0,24%                | 0,020836 | 325,338            | 140,782               | 36             |
| 0,0001           | 0,43%                | 0,002084 | 1892,59            | 614,891               | 366            |
| 0,001            | 0,43%                | 0,0021   | 4194,05            | 1363,58               | 1363           |
| 0,01             | 1,19%                | 3,83E-07 | 16524,5            | 3254,53               | 5730           |
| 0,05             | 1,72%                | 1,13E-09 | 37523,7            | 6161,93               | 15398          |
| 0,1              | 2,02%                | 4,43E-11 | 56111              | 8515,97               | 24527          |
| 0,2              | 2,26%                | 3,21E-12 | 80217,4            | 11512,3               | 36951          |
| 0,5              | 2,27%                | 2,73E-12 | 121418             | 17368,2               | 61616          |
| 1                | 2,14%                | 1,11E-11 | 150398             | 22143,8               | 79697          |

569 *Note.* Threshold = P value threshold, for inclusion of SNPs, R2 = Variance explained by PGS, P = P value of  
570 association, Coefficient = Coefficient of PGS association, Standard.Error = Standard error of coefficient,  
571 Num\_SNP = Number of included SNPs

572 **Table S3**

573 *Prediction of BPD case-control status by Loneliness-PGS in sample 2*

| <b>Threshold</b> | <b>R<sup>2</sup></b> | <b>P</b> | <b>Coefficient</b> | <b>Standard.Error</b> | <b>Num_SNP</b> |
|------------------|----------------------|----------|--------------------|-----------------------|----------------|
| 5,00E-08         | 0,52%                | 0,184573 | 238,21             | 179,536               | 12             |
| 1,00E-06         | 0,02%                | 0,780057 | 88,6995            | 317,641               | 37             |
| 0,0001           | 1,59%                | 0,020926 | 3028,34            | 1311,36               | 343            |
| 0,001            | 1,06%                | 0,058203 | 5771,3             | 3046,89               | 1405           |
| 0,01             | 4,26%                | 0,000195 | 27890,4            | 7486,94               | 6063           |
| 0,05             | 5,39%                | 2,99E-05 | 60046,1            | 14384,1               | 16795          |
| 0,1              | 6,60%                | 4,41E-06 | 94635,6            | 20613,8               | 26996          |
| 0,2              | 6,46%                | 5,26E-06 | 123476             | 27113,7               | 41098          |
| 0,5              | 5,32%                | 3,34E-05 | 170799             | 41169,9               | 68989          |
| 1                | 5,27%                | 3,57E-05 | 219538             | 53109                 | 90449          |

574 *Note.* Threshold = P value threshold, for inclusion of SNPs, R2 = Variance explained by PGS, P = P value of  
575 association, Coefficient = Coefficient of PGS association, Standard.Error = Standard error of coefficient,  
576 Num\_SNP = Number of included SNPs

577

578

579 **Table S4**

580 *Prediction of BPD case-control status by Neuroticism-PGS in sample 1*

| <b>Threshold</b> | <b>R<sup>2</sup></b> | <b>P</b> | <b>Coefficient</b> | <b>Standard.Error</b> | <b>Num_SNP</b> |
|------------------|----------------------|----------|--------------------|-----------------------|----------------|
| 5,00E-08         | 1,20%                | 3,12E-07 | 0,976372           | 0,190851              | 128            |
| 1,00E-06         | 1,26%                | 1,67E-07 | 1,70203            | 0,325235              | 275            |
| 0,0001           | 1,52%                | 1,00E-08 | 5,06256            | 0,883501              | 1183           |
| 0,001            | 1,83%                | 3,20E-10 | 10,8374            | 1,72329               | 3056           |
| 0,01             | 2,93%                | 2,42E-15 | 28,3215            | 3,57706               | 8696           |
| 0,05             | 3,22%                | 1,16E-16 | 52,9985            | 6,39506               | 19658          |
| 0,1              | 3,26%                | 7,49E-17 | 69,6909            | 8,35724               | 28347          |
| 0,2              | 2,82%                | 7,29E-15 | 85,4205            | 10,9805               | 40422          |
| 0,5              | 2,80%                | 9,39E-15 | 125,074            | 16,1443               | 62962          |
| 1                | 2,68%                | 3,32E-14 | 151,182            | 19,9308               | 78434          |

581 *Note.* Threshold = P value threshold, for inclusion of SNPs, R2 = Variance explained by PGS, P = P value of  
582 association, Coefficient = Coefficient of PGS association, Standard.Error = Standard error of coefficient,  
583 Num\_SNP = Number of included SNPs



584 **Table S5**

585 *Prediction of BPD case-control status by Neuroticism-PGS in sample 2*

| <b>Threshold</b> | <b>R<sup>2</sup></b> | <b>P</b> | <b>Coefficient</b> | <b>Standard.Error</b> | <b>Num_SNP</b> |
|------------------|----------------------|----------|--------------------|-----------------------|----------------|
| 5,00E-08         | 1,05%                | 0,086132 | 0,858867           | 0,500458              | 118            |
| 1,00E-06         | 1,14%                | 0,062194 | 1,42983            | 0,7667                | 248            |
| 0,0001           | 2,95%                | 0,001887 | 6,24455            | 2,00948               | 1167           |
| 0,001            | 2,87%                | 0,002042 | 11,6664            | 3,78271               | 3022           |
| 0,01             | 5,11%                | 4,52E-05 | 31,9979            | 7,84412               | 8918           |
| 0,05             | 4,94%                | 6,07E-05 | 59,0445            | 14,7243               | 20775          |
| 0,1              | 7,20%                | 1,62E-06 | 97,3458            | 20,3                  | 30379          |
| 0,2              | 5,93%                | 1,21E-05 | 116,457            | 26,6188               | 44142          |
| 0,5              | 6,64%                | 3,82E-06 | 185,185            | 40,0769               | 69857          |
| 1                | 6,68%                | 3,58E-06 | 233,764            | 50,4433               | 88317          |

586 *Note.* Threshold = P value threshold, for inclusion of SNPs, R2 = Variance explained by PGS, P = P value of  
587 association, Coefficient = Coefficient of PGS association, Standard.Error = Standard error of coefficient,  
588 Num\_SNP = Number of included SNPs

589

590

591 **Table S6**

592 *Prediction of BPD case-control status by Loneliness-PGS in sample 1, adjusted for Neuroticism-PGS*

| <b>Threshold</b> | <b>R<sup>2</sup></b> | <b>P</b> | <b>Coefficient</b> | <b>Standard.Error</b> | <b>Num_SNP</b> |
|------------------|----------------------|----------|--------------------|-----------------------|----------------|
| 5,00E-08         | 0,00%                | 0,928028 | 7,09112            | 78,5055               | 11             |
| 1,00E-06         | 0,05%                | 0,285938 | 153,727            | 144,064               | 36             |
| 0,0001           | 0,07%                | 0,214689 | 788,579            | 635,554               | 366            |
| 0,001            | 0,01%                | 0,661796 | 633,814            | 1448,93               | 1363           |
| 0,01             | 0,19%                | 0,036556 | 7364,58            | 3522,57               | 5730           |
| 0,05             | 0,34%                | 0,005847 | 18823,3            | 6829,29               | 15398          |
| 0,1              | 0,47%                | 0,001084 | 30925,7            | 9464,2                | 24527          |
| 0,2              | 0,62%                | 0,000199 | 47475,4            | 12762,2               | 36951          |
| 0,5              | 0,62%                | 0,000193 | 71895,5            | 19283,9               | 61616          |
| 1                | 0,55%                | 0,000458 | 86204,7            | 24600,3               | 79697          |

593 *Note.* Threshold = P value threshold, for inclusion of SNPs, R2 = Variance explained by PGS, P = P value of  
594 association, Coefficient = Coefficient of PGS association, Standard.Error = Standard error of coefficient,  
595 Num\_SNP = Number of included SNPs

596 **Table S7**

597 *Prediction of BPD case-control status by Loneliness-PGS in sample 2, adjusted for Neuroticism-PGS*

| <b>Threshold</b> | <b>R<sup>2</sup></b> | <b>P</b> | <b>Coefficient</b> | <b>Standard.Error</b> | <b>Num_SNP</b> |
|------------------|----------------------|----------|--------------------|-----------------------|----------------|
| <i>5,00E-08</i>  | 0,22%                | 0,62118  | 160,864            | 325,517               | 12             |
| <i>1,00E-06</i>  | 0,00%                | 0,925435 | -42,5059           | 454,172               | 37             |
| <i>0,0001</i>    | 0,67%                | 0,157369 | 2102,7             | 1487,08               | 343            |
| <i>0,001</i>     | 0,15%                | 0,493603 | 2327,8             | 3400,28               | 1405           |
| <i>0,01</i>      | 1,58%                | 0,020136 | 18676,5            | 8037,06               | 6063           |
| <i>0,05</i>      | 1,97%                | 0,00903  | 40811,2            | 15631,1               | 16795          |
| <i>0,1</i>       | 2,73%                | 0,002126 | 68385,9            | 22260,9               | 26996          |
| <i>0,2</i>       | 2,60%                | 0,00264  | 88055,8            | 29285,1               | 41098          |
| <i>0,5</i>       | 1,78%                | 0,012332 | 111941             | 44731,7               | 68989          |
| <i>1</i>         | 1,73%                | 0,013757 | 142390             | 57799,1               | 90449          |

598 *Note.* Threshold = P value threshold, for inclusion of SNPs, R2 = Variance explained by PGS, P = P value of  
599 association, Coefficient = Coefficient of PGS association, Standard.Error = Standard error of coefficient,  
600 Num\_SNP = Number of included SNPs
