# Supplementary material for: Evidence for a shared genetic contribution to loneliness and Borderline Personality Disorder
Source: bioRxiv or medRxiv preprint supplement (doi:10.1101/2023.03.16.23286984), 2023-08-18
Supplement: Supplementary file [file media-1.pdf]

## Supplementary Material

### Evidence for a shared genetic contribution to loneliness and Borderline Personality Disorder

Anna Schulze<sup>1\*</sup>; Fabian Streit, PhD<sup>2\*</sup>; Lea Zillich<sup>2</sup>; Swapnil Awasthi<sup>3,4</sup>; Alisha S M Hall<sup>2,5,6</sup>; Martin Jungkunz, PhD<sup>7</sup>; Nikolaus Kleindienst, PhD<sup>8</sup>; Josef Frank<sup>2</sup>; Cornelia E Schwarze, PhD<sup>9</sup>; Norbert Dahmen, MD<sup>10</sup>; Björn H Schott, MD, PhD<sup>11,12,13</sup>; Markus Nöthen, MD<sup>14</sup>; Arian Mobascher, MD<sup>15</sup>; Dan Rujescu, MD<sup>16</sup>; Klaus Lieb, MD<sup>10</sup>; Stefan Roepke, MD<sup>17</sup>; Sabine C Herpertz, MD<sup>18</sup>; Christian Schmahl, MD<sup>8</sup>; Martin Bohus, MD<sup>8,19</sup>; Stephan Ripke, MD, PhD<sup>3,4,20</sup>; Marcella Rietschel, PhD<sup>2</sup>; Stefanie Lis, PhD<sup>1,8\*</sup>; Stephanie Witt, PhD<sup>2\*</sup>

\*contributed equally

<sup>1</sup>Department of Clinical Psychology, Central Institute of Mental Health, Medical Faculty Mannheim, Heidelberg University, Mannheim, Germany

<sup>2</sup>Department of Genetic Epidemiology in Psychiatry, Central Institute of Mental Health, Medical Faculty Mannheim, Heidelberg University, Mannheim, Germany

<sup>3</sup>Stanley Center for Psychiatric Research, Broad Institute of MIT and Harvard, Cambridge, MA, USA

<sup>4</sup>Department of Psychiatry and Psychotherapy, Charité Universitätsmedizin Berlin, Campus Mitte, Berlin, Germany

<sup>5</sup>Department of Clinical Medicine, Aarhus University, Aarhus, Denmark

<sup>6</sup>Department of Affective Disorders, Aarhus University Hospital-Psychiatry, Aarhus, Denmark

<sup>7</sup>Section for Translational Medical Ethics, National Center for Tumor Diseases, German Cancer Research Center (DKFZ), Heidelberg, Germany

<sup>8</sup>Department of Psychosomatic Medicine and Psychotherapy, Central Institute of Mental Health, Medical Faculty Mannheim, Heidelberg University, Germany

<sup>9</sup>Department of Developmental and Biological Psychology, Heidelberg University, Heidelberg, Germany

<sup>10</sup>Department of Psychiatry and Psychotherapy, University Medical Center Mainz, Mainz, Germany

<sup>11</sup>Leibniz Institute for Neurobiology, Magdeburg, Germany

<sup>12</sup>Department of Psychiatry and Psychotherapy, University Medical Center Göttingen, Göttingen, Germany

<sup>13</sup>German Center for Neurodegenerative Diseases (DZNE), Göttingen, Germany

<sup>14</sup>Institute of Human Genetics, University Hospital Bonn, Bonn, Germany

<sup>15</sup>Department of Psychiatry and Psychotherapy, St. Elisabeth Krankenhaus Lahnstein, Lahnstein, Germany

<sup>16</sup>Department of Psychiatry and Psychotherapy, Medical University of Vienna, Vienna, Austria

<sup>17</sup>Department of Psychiatry and Neuroscience, Charité – Universitätsmedizin Berlin, Berlin, Germany

<sup>18</sup>Department of General Psychiatry, Center for Psychosocial Medicine, Medical Faculty, Heidelberg University, Heidelberg, Germany

<sup>19</sup>Department of Clinical Psychology, Ruhr University Bochum, Bochum, Germany

<sup>20</sup>Massachusetts General Hospital and Department of Medicine, Harvard Medical School, Analytic and Translational Genetics Unit, Boston, MA, USA

**Table S1***Number of SNPs included in PGS*

| PT                 | <i>loneliness</i> |          | <i>neuroticism</i> |          |
|--------------------|-------------------|----------|--------------------|----------|
|                    | sample 1          | sample 2 | sample 1           | sample 2 |
| 5x10 <sup>-8</sup> | 11                | 12       | 128                | 118      |
| 1x10 <sup>-6</sup> | 36                | 37       | 275                | 248      |
| 0.0001             | 366               | 343      | 1183               | 1167     |
| 0.001              | 1363              | 1405     | 3056               | 3022     |
| 0.01               | 5730              | 6063     | 8696               | 8918     |
| 0.05               | 15,398            | 16,795   | 19,658             | 20,775   |
| 0.1                | 24,527            | 26,996   | 28,347             | 30,379   |
| 0.2                | 36,951            | 41,098   | 40,422             | 44,142   |
| 0.5                | 61,616            | 68,989   | 62,962             | 69,857   |
| 1                  | 79,697            | 90,449   | 78,434             | 88,317   |

*Note.* Number of SNPs included for the calculation of polygenic scores (PGS) for loneliness and neuroticism at the different p-value thresholds, shown for both samples. SNP = single nucleotide polymorphism; PT = p-value threshold, PGS = polygenic score

**Table S2***Prediction of BPD case-control status by Loneliness-PGS in sample 1*

| <b>Threshold</b> | <b>R<sup>2</sup></b> | <b>P</b> | <b>Coefficient</b> | <b>Standard.Error</b> | <b>Num_SNP</b> |
|------------------|----------------------|----------|--------------------|-----------------------|----------------|
| 5,00E-08         | 0,02%                | 0,485134 | 53,9157            | 77,2355               | 11             |
| 1,00E-06         | 0,24%                | 0,020836 | 325,338            | 140,782               | 36             |
| 0,0001           | 0,43%                | 0,002084 | 1892,59            | 614,891               | 366            |
| 0,001            | 0,43%                | 0,0021   | 4194,05            | 1363,58               | 1363           |
| 0,01             | 1,19%                | 3,83E-07 | 16524,5            | 3254,53               | 5730           |
| 0,05             | 1,72%                | 1,13E-09 | 37523,7            | 6161,93               | 15398          |
| 0,1              | 2,02%                | 4,43E-11 | 56111              | 8515,97               | 24527          |
| 0,2              | 2,26%                | 3,21E-12 | 80217,4            | 11512,3               | 36951          |
| 0,5              | 2,27%                | 2,73E-12 | 121418             | 17368,2               | 61616          |
| 1                | 2,14%                | 1,11E-11 | 150398             | 22143,8               | 79697          |

*Note.* Threshold = P value threshold, for inclusion of SNPs, R2 = Variance explained by PGS, P = P value of association, Coefficient = Coefficient of PGS association, Standard.Error = Standard error of coefficient, Num\_SNP = Number of included SNPs

**Table S3***Prediction of BPD case-control status by Loneliness-PGS in sample 2*

| <b>Threshold</b> | <b>R<sup>2</sup></b> | <b>P</b> | <b>Coefficient</b> | <b>Standard.Error</b> | <b>Num_SNP</b> |
|------------------|----------------------|----------|--------------------|-----------------------|----------------|
| 5,00E-08         | 0,52%                | 0,184573 | 238,21             | 179,536               | 12             |
| 1,00E-06         | 0,02%                | 0,780057 | 88,6995            | 317,641               | 37             |
| 0,0001           | 1,59%                | 0,020926 | 3028,34            | 1311,36               | 343            |
| 0,001            | 1,06%                | 0,058203 | 5771,3             | 3046,89               | 1405           |
| 0,01             | 4,26%                | 0,000195 | 27890,4            | 7486,94               | 6063           |
| 0,05             | 5,39%                | 2,99E-05 | 60046,1            | 14384,1               | 16795          |
| 0,1              | 6,60%                | 4,41E-06 | 94635,6            | 20613,8               | 26996          |
| 0,2              | 6,46%                | 5,26E-06 | 123476             | 27113,7               | 41098          |
| 0,5              | 5,32%                | 3,34E-05 | 170799             | 41169,9               | 68989          |
| 1                | 5,27%                | 3,57E-05 | 219538             | 53109                 | 90449          |

*Note.* Threshold = P value threshold, for inclusion of SNPs, R<sup>2</sup> = Variance explained by PGS, P = P value of association, Coefficient = Coefficient of PGS association, Standard.Error = Standard error of coefficient, Num\_SNP = Number of included SNPs

**Table S4***Prediction of BPD case-control status by Neuroticism-PGS in sample 1*

| <b>Threshold</b> | <b>R<sup>2</sup></b> | <b>P</b> | <b>Coefficient</b> | <b>Standard.Error</b> | <b>Num_SNP</b> |
|------------------|----------------------|----------|--------------------|-----------------------|----------------|
| 5,00E-08         | 1,20%                | 3,12E-07 | 0,976372           | 0,190851              | 128            |
| 1,00E-06         | 1,26%                | 1,67E-07 | 1,70203            | 0,325235              | 275            |
| 0,0001           | 1,52%                | 1,00E-08 | 5,06256            | 0,883501              | 1183           |
| 0,001            | 1,83%                | 3,20E-10 | 10,8374            | 1,72329               | 3056           |
| 0,01             | 2,93%                | 2,42E-15 | 28,3215            | 3,57706               | 8696           |
| 0,05             | 3,22%                | 1,16E-16 | 52,9985            | 6,39506               | 19658          |
| 0,1              | 3,26%                | 7,49E-17 | 69,6909            | 8,35724               | 28347          |
| 0,2              | 2,82%                | 7,29E-15 | 85,4205            | 10,9805               | 40422          |
| 0,5              | 2,80%                | 9,39E-15 | 125,074            | 16,1443               | 62962          |
| 1                | 2,68%                | 3,32E-14 | 151,182            | 19,9308               | 78434          |

*Note.* Threshold = P value threshold, for inclusion of SNPs, R<sup>2</sup> = Variance explained by PGS, P = P value of association, Coefficient = Coefficient of PGS association, Standard.Error = Standard error of coefficient, Num\_SNP = Number of included SNPs

**Table S5***Prediction of BPD case-control status by Neuroticism-PGS in sample 2*

| <b>Threshold</b> | <b>R<sup>2</sup></b> | <b>P</b> | <b>Coefficient</b> | <b>Standard.Error</b> | <b>Num_SNP</b> |
|------------------|----------------------|----------|--------------------|-----------------------|----------------|
| 5,00E-08         | 1,05%                | 0,086132 | 0,858867           | 0,500458              | 118            |
| 1,00E-06         | 1,14%                | 0,062194 | 1,42983            | 0,7667                | 248            |
| 0,0001           | 2,95%                | 0,001887 | 6,24455            | 2,00948               | 1167           |
| 0,001            | 2,87%                | 0,002042 | 11,6664            | 3,78271               | 3022           |
| 0,01             | 5,11%                | 4,52E-05 | 31,9979            | 7,84412               | 8918           |
| 0,05             | 4,94%                | 6,07E-05 | 59,0445            | 14,7243               | 20775          |
| 0,1              | 7,20%                | 1,62E-06 | 97,3458            | 20,3                  | 30379          |
| 0,2              | 5,93%                | 1,21E-05 | 116,457            | 26,6188               | 44142          |
| 0,5              | 6,64%                | 3,82E-06 | 185,185            | 40,0769               | 69857          |
| 1                | 6,68%                | 3,58E-06 | 233,764            | 50,4433               | 88317          |

Note. Threshold = P value threshold, for inclusion of SNPs, R<sup>2</sup> = Variance explained by PGS, P = P value of association, Coefficient = Coefficient of PGS association, Standard.Error = Standard error of coefficient, Num\_SNP = Number of included SNPs

**Table S6***Prediction of BPD case-control status by Loneliness-PGS in sample 1, adjusted for Neuroticism-PGS*

| <b>Threshold</b> | <b>R<sup>2</sup></b> | <b>P</b> | <b>Coefficient</b> | <b>Standard.Error</b> | <b>Num_SNP</b> |
|------------------|----------------------|----------|--------------------|-----------------------|----------------|
| 5,00E-08         | 0,00%                | 0,928028 | 7,09112            | 78,5055               | 11             |
| 1,00E-06         | 0,05%                | 0,285938 | 153,727            | 144,064               | 36             |
| 0,0001           | 0,07%                | 0,214689 | 788,579            | 635,554               | 366            |
| 0,001            | 0,01%                | 0,661796 | 633,814            | 1448,93               | 1363           |
| 0,01             | 0,19%                | 0,036556 | 7364,58            | 3522,57               | 5730           |
| 0,05             | 0,34%                | 0,005847 | 18823,3            | 6829,29               | 15398          |
| 0,1              | 0,47%                | 0,001084 | 30925,7            | 9464,2                | 24527          |
| 0,2              | 0,62%                | 0,000199 | 47475,4            | 12762,2               | 36951          |
| 0,5              | 0,62%                | 0,000193 | 71895,5            | 19283,9               | 61616          |
| 1                | 0,55%                | 0,000458 | 86204,7            | 24600,3               | 79697          |

Note. Threshold = P value threshold, for inclusion of SNPs, R<sup>2</sup> = Variance explained by PGS, P = P value of association, Coefficient = Coefficient of PGS association, Standard.Error = Standard error of coefficient, Num\_SNP = Number of included SNPs

**Table S7***Prediction of BPD case-control status by Loneliness-PGS in sample 2, adjusted for Neuroticism-PGS*

| <b>Threshold</b> | <b>R<sup>2</sup></b> | <b>P</b> | <b>Coefficient</b> | <b>Standard.Error</b> | <b>Num_SNP</b> |
|------------------|----------------------|----------|--------------------|-----------------------|----------------|
| 5,00E-08         | 0,22%                | 0,62118  | 160,864            | 325,517               | 12             |
| 1,00E-06         | 0,00%                | 0,925435 | -42,5059           | 454,172               | 37             |
| 0,0001           | 0,67%                | 0,157369 | 2102,7             | 1487,08               | 343            |
| 0,001            | 0,15%                | 0,493603 | 2327,8             | 3400,28               | 1405           |
| 0,01             | 1,58%                | 0,020136 | 18676,5            | 8037,06               | 6063           |
| 0,05             | 1,97%                | 0,00903  | 40811,2            | 15631,1               | 16795          |
| 0,1              | 2,73%                | 0,002126 | 68385,9            | 22260,9               | 26996          |
| 0,2              | 2,60%                | 0,00264  | 88055,8            | 29285,1               | 41098          |
| 0,5              | 1,78%                | 0,012332 | 111941             | 44731,7               | 68989          |
| 1                | 1,73%                | 0,013757 | 142390             | 57799,1               | 90449          |

Note. Threshold = P value threshold, for inclusion of SNPs, R2 = Variance explained by PGS, P = P value of association, Coefficient = Coefficient of PGS association, Standard.Error = Standard error of coefficient, Num\_SNP = Number of included SNPs
